# Supplementary material for: An analysis of Schottky barrier in silicene/Ga2SeS heterostructures by employing electric field and strain
Source: Royal Society of Chemistry journal article supplement (doi:10.1039/d2cp00228k), 2022-01-01
Supplement: d2cp00228k2.pdf [file d2cp00228k2.pdf]

Supplementary Material

**An analysis of Schottky barrier in silicene/Ga<sub>2</sub>SeS heterostructures by employing electric field and strain**

R. Caglayan and H.E. Guler

*Department of Physics, Faculty of Science, Ankara University, 06100, Ankara, Turkey*

Y. Mogulkoc\*

*Department of Physics Engineering, Faculty of Engineering, Ankara University, 06100, Ankara, Turkey*

(Dated: March 31, 2022)

---

\*Electronic address: [mogulkoc@eng.ankara.edu.tr](mailto:mogulkoc@eng.ankara.edu.tr)

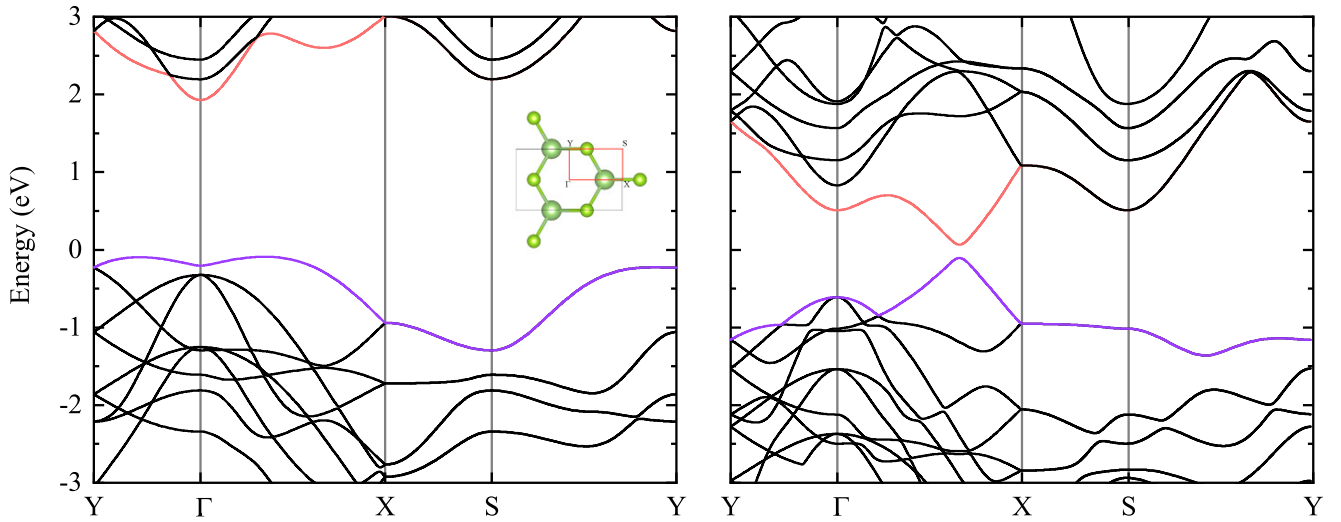

FIG. S1: The electronic band structures of orthogonal  $\text{Ga}_2\text{SeS}$  and silicene/ $\text{Ga}_2\text{SeS}$  heterostructure.

Pseudo-atomic localized basis function had been performed by using OpenMX 3.9 package [1] for first principles calculations. The Perdew-Burke-Ernzerhof approach from the generalized gradient approximation (PBE-GGA) [2] was applied to describe the exchange-correlation functional and the norm conserving pseudopotentials [3–5]. The Brillouin zone integration was performed with  $17 \times 17 \times 1$  k-point mesh using the Monkhorst-Pack method [6]. The energy cutoff was set to be 300 Ry. A vacuum space of 25 Å was applied in the direction perpendicular to the sheet to avoid the interaction between imaginary images. Geometry optimization was performed until the maximum force on each atom was less than 0.002 Hartree/Bohr.

### References

- 
- [1] Y.-T. Lee and T. Ozaki, *Journal of molecular graphics & modelling* **89**, 192 (2019).
  - [2] J. P. Perdew, K. Burke, and M. Ernzerhof, *Phys. Rev. Lett.* **77**, 3865 (1996).
  - [3] T. Ozaki, *Phys. Rev. B* **67**, 155108 (2003).
  - [4] T. Ozaki and H. Kino, *Phys. Rev. B* **69**, 195113 (2004).
  - [5] T. Ozaki and H. Kino, *Phys. Rev. B* **72**, 045121 (2005).
  - [6] H. J. Monkhorst and J. D. Pack, *Phys. Rev. B* **13**, 5188 (1976).

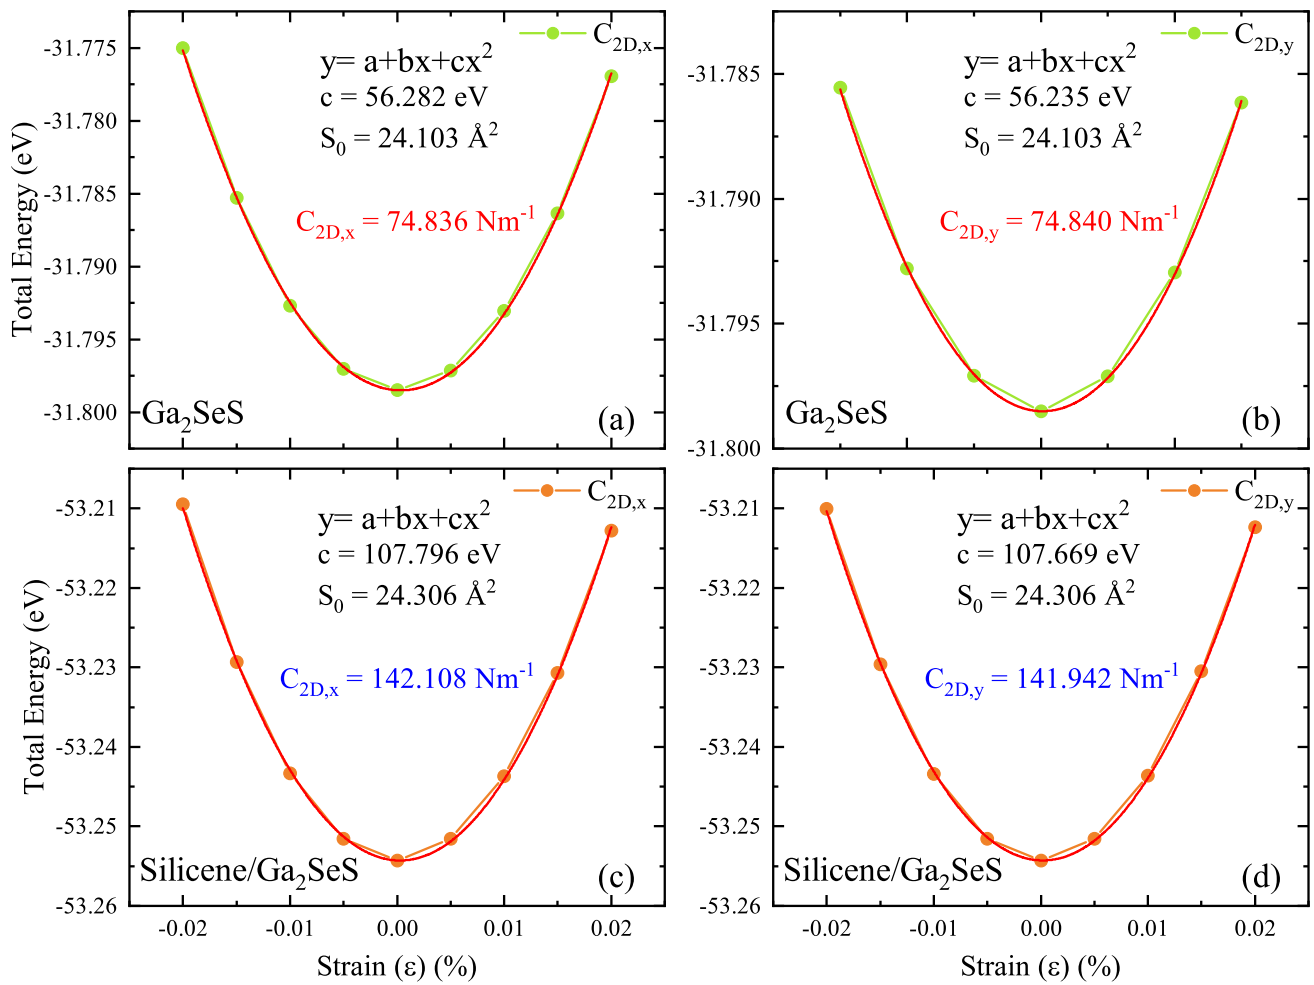

FIG. S2: The variation of total energies of monolayer Ga<sub>2</sub>SeS and silicene/Ga<sub>2</sub>SeS heterostructure under the presence of uniaxial strain.

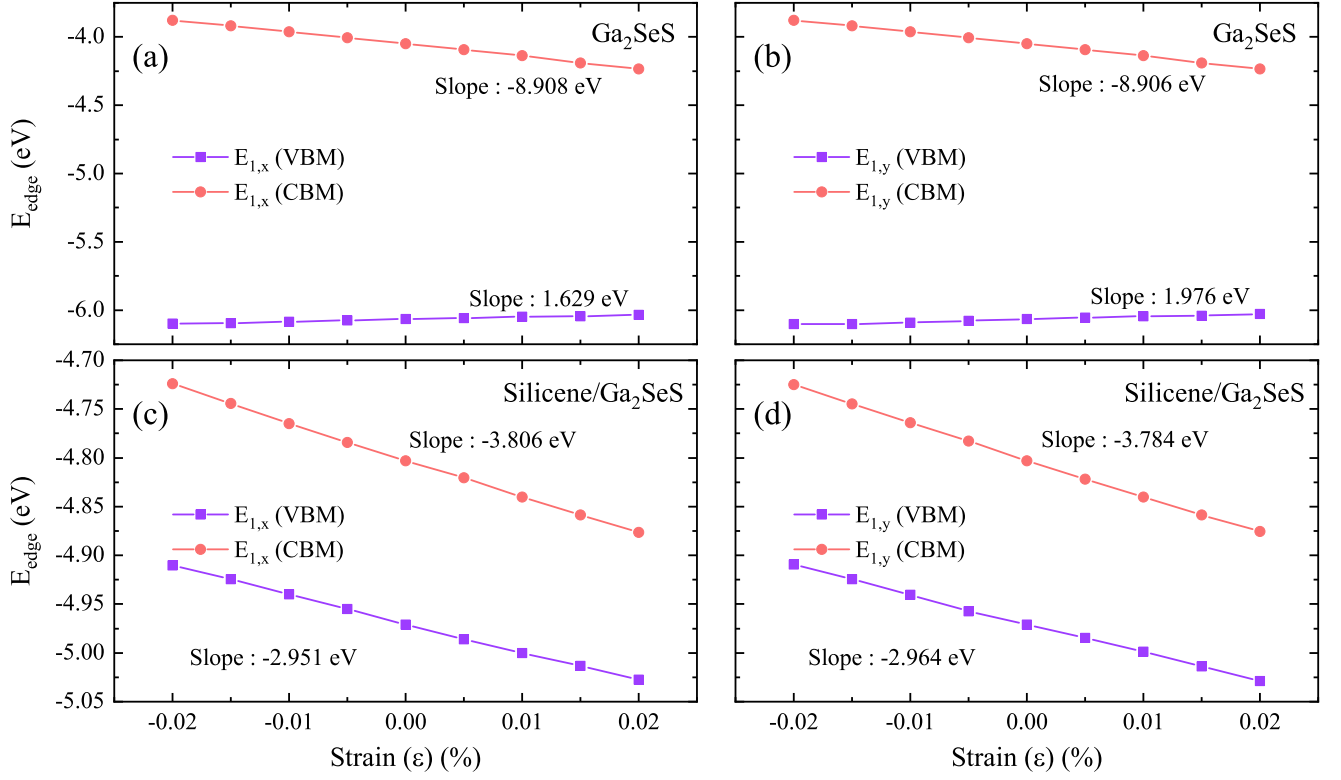

FIG. S3: Band edge positions of (a)-(b) monolayer Ga<sub>2</sub>SeS and (c)-(d) silicene/Ga<sub>2</sub>SeS heterostructure as a function of uniaxial strain in x and y directions.

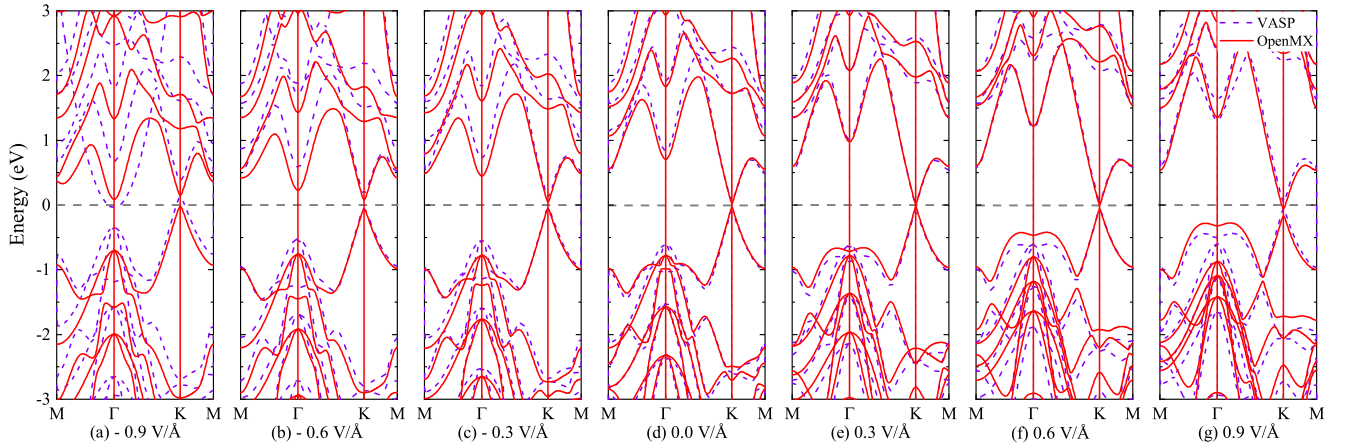

FIG. S4: The electronic band spectrum of the variation of perpendicular electric field.
